# Supplementary material
Source: PubMed Central journal article supplement (PMC1785404)
Supplement: plntcell_tpc.106.044958_1.pdf [file plntcell_tpc.106.044958_1.pdf]

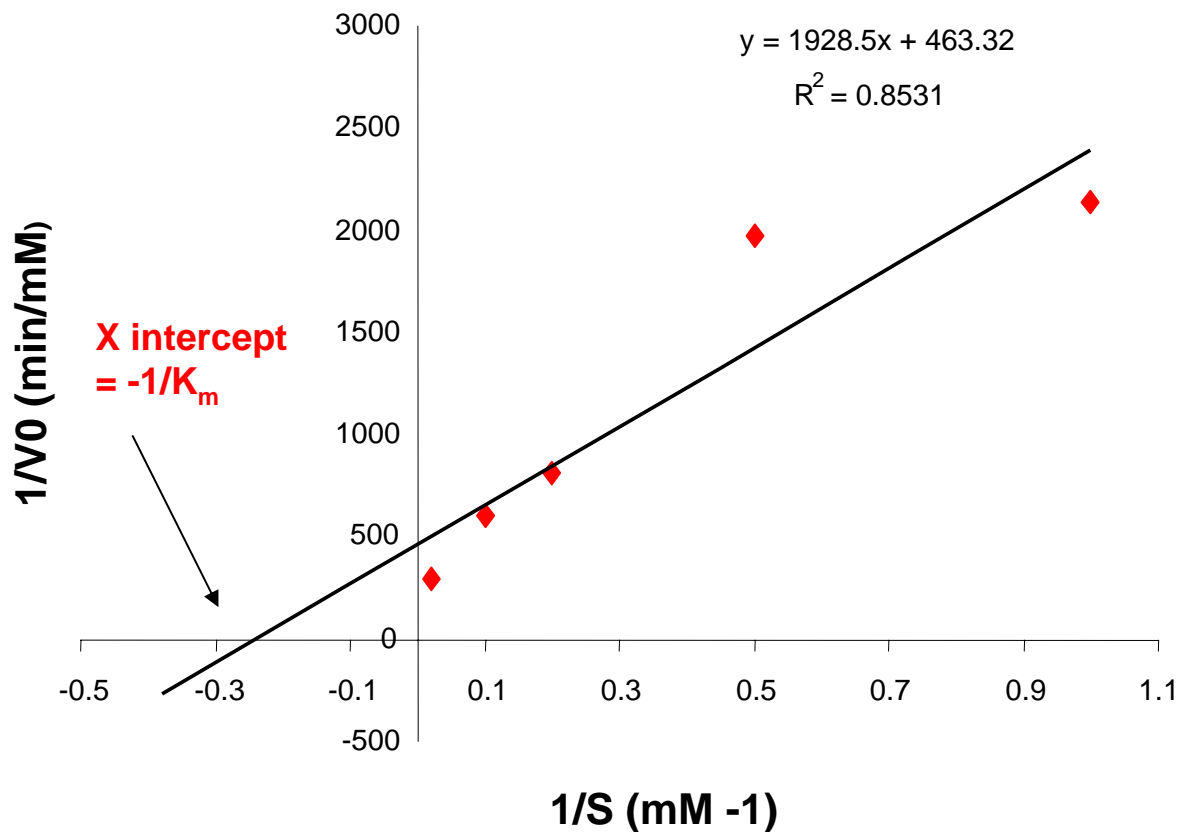

**Supplemental Figure 1.** Determination of the apparent  $K_m$  for L-Thr of THA2 cloned in yeast. Acetaldehyde release was quantified as a function of Thr concentration by measuring the absorption of an azine derivative formed by the reaction of acetaldehyde with N-methyl benzothiazolone hydrazone (MBTH) at 305nm on Spectramax Plus spectrophotometer (Molecular Devices, Sunnyvale, CA), as described by Paz et.al., (1965). An apparent  $K_m$   $3.80 \pm 0.72$  mM for Thr was calculated using Lineweaver-Burke plots (mean  $\pm$  s.d. of three independent experiments, one of which is shown in this figure).
