# Supplementary material
Source: PubMed Central journal article supplement (PMC1785404)
Supplement: plntcell_tpc.106.044958_2.pdf [file plntcell_tpc.106.044958_2.pdf]

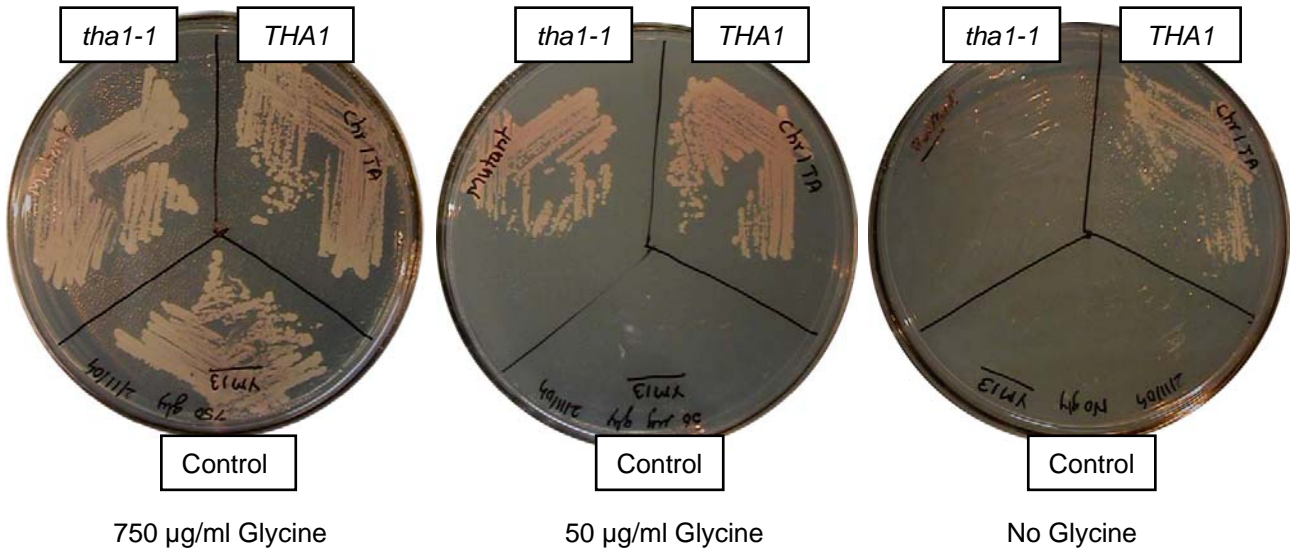

**Supplemental Figure 2.** A wild-type *THA1* construct rescues growth of yeast strain YM13 (*gly1 shm1 shm2*) on SD medium without glycine, but a *tha1-1* construct does not. Supplementation with 50 µg/ml glycine allows growth of the *tha1-1* transformant, but not the control strain. All three strains grow when glycine is added at 750 µg/ml. This suggests partial activity of the *tha1-1* missense mutant protein in yeast strain YM13.
