# Supplementary material
Source: PubMed Central journal article supplement (PMC1785404)
Supplement: plntcell_tpc.106.044958_4.pdf [file plntcell_tpc.106.044958_4.pdf]

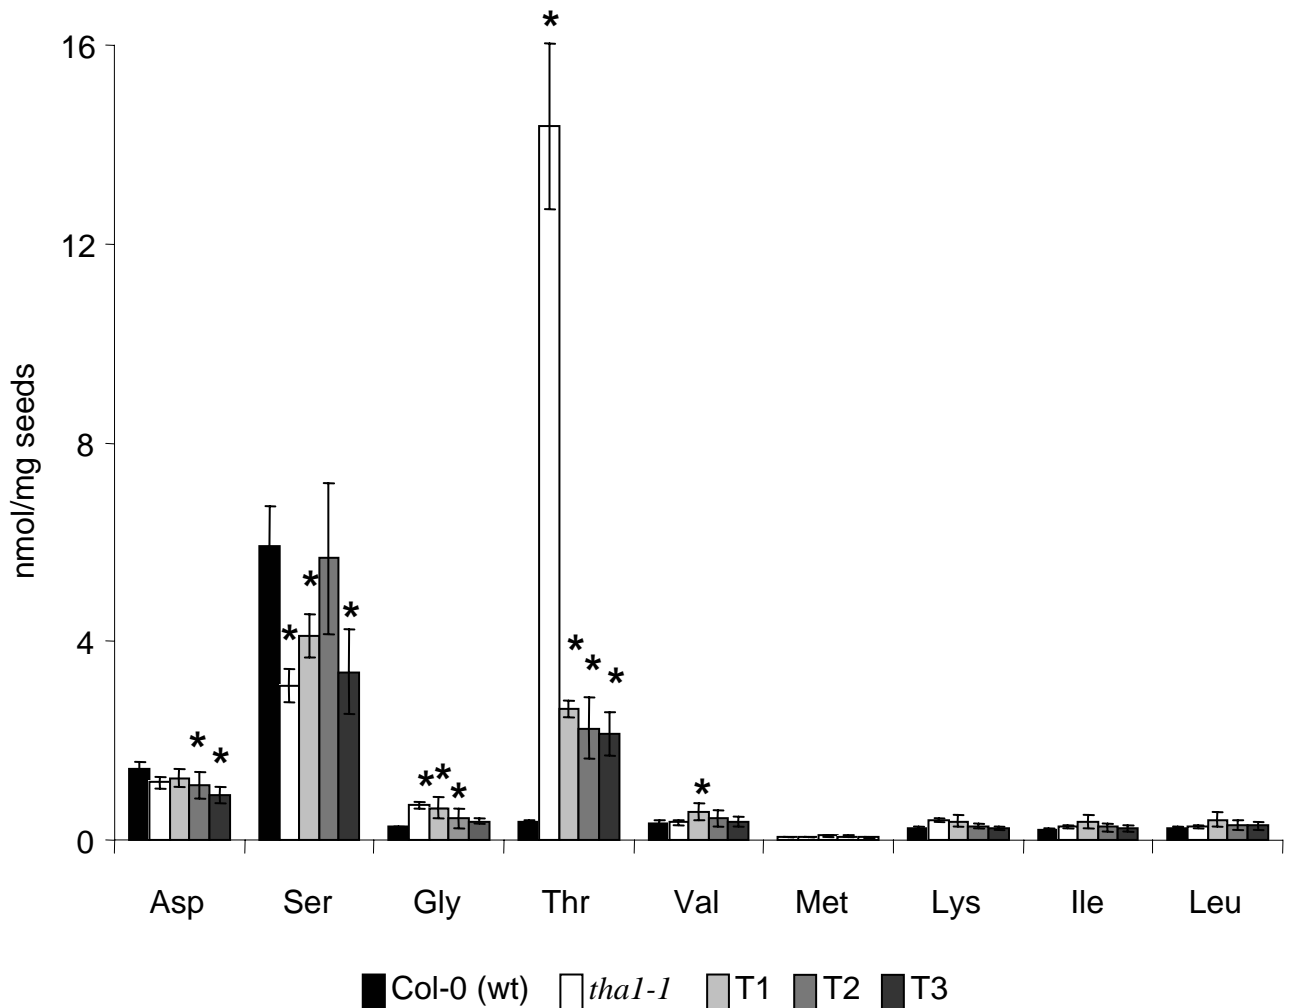

**Supplemental Figure 4.** Complementation of *tha1-1* high Thr phenotype by transformation with genomic *THA1* shows reduction in Thr content in the T3 generation seeds of three independent transformants (T1, T2 and T3). Mean +/- st. dev. of 5 samples. \*P < 0.01, Student's t-test compared to Col-0 (wt).
