# Supplementary material
Source: PubMed Central journal article supplement (PMC1785404)
Supplement: plntcell_tpc.106.044958_5.pdf [file plntcell_tpc.106.044958_5.pdf]

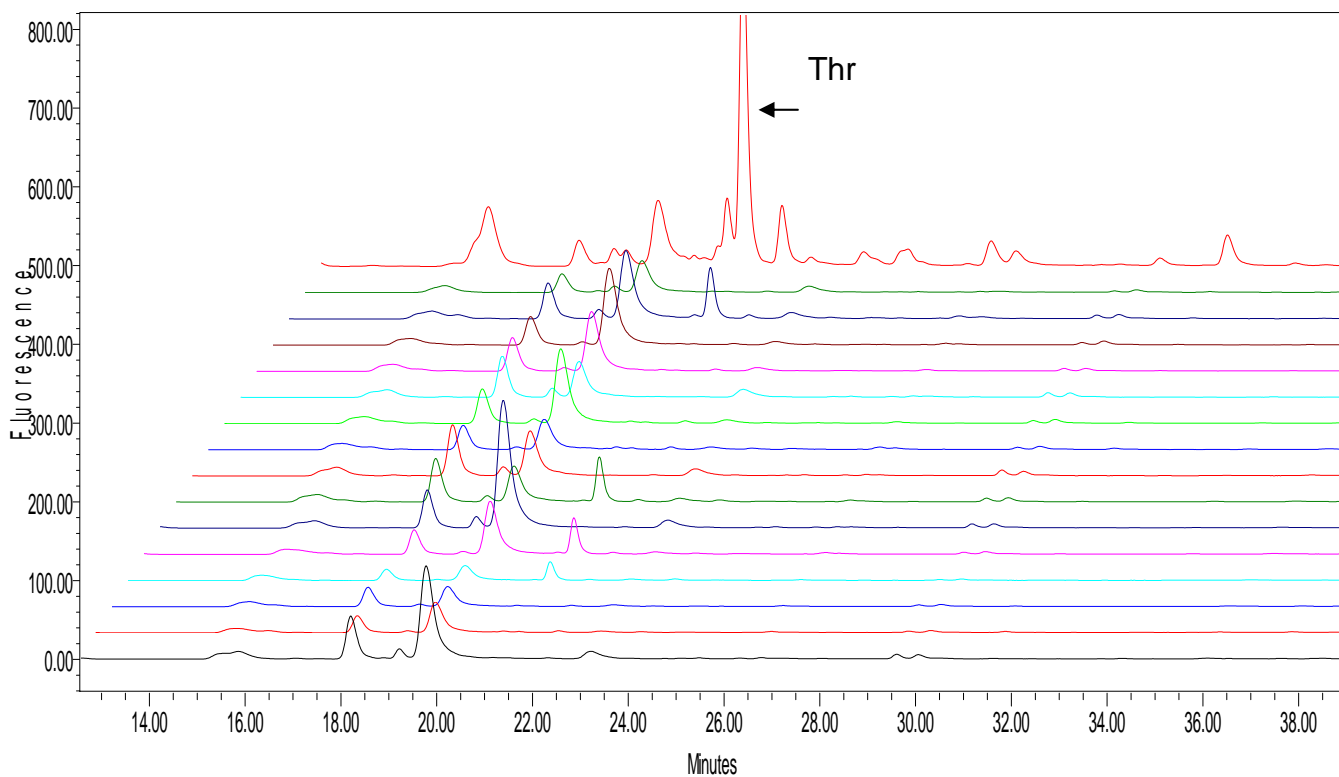

**Supplemental Figure 5.** Thr content of single mature seeds from *THA1/tha1-1* heterozygotes. The upper-most chromatogram shows the Thr peak (marked with arrow) in a sample prepared with pooled seeds harvested from a homozygous *tha1-1* mutant, the others are assays of individual seeds from *THA1/tha1* heterozygotes. Whereas Thr is undetectable in single seeds from wild-type plants by this assay, 4 of 15 single seeds from *THA1/tha1-1* heterozygous parent plants have elevated Thr.
