# Supplementary material
Source: PubMed Central journal article supplement (PMC1785404)
Supplement: plntcell_tpc.106.044958_7.pdf [file plntcell_tpc.106.044958_7.pdf]

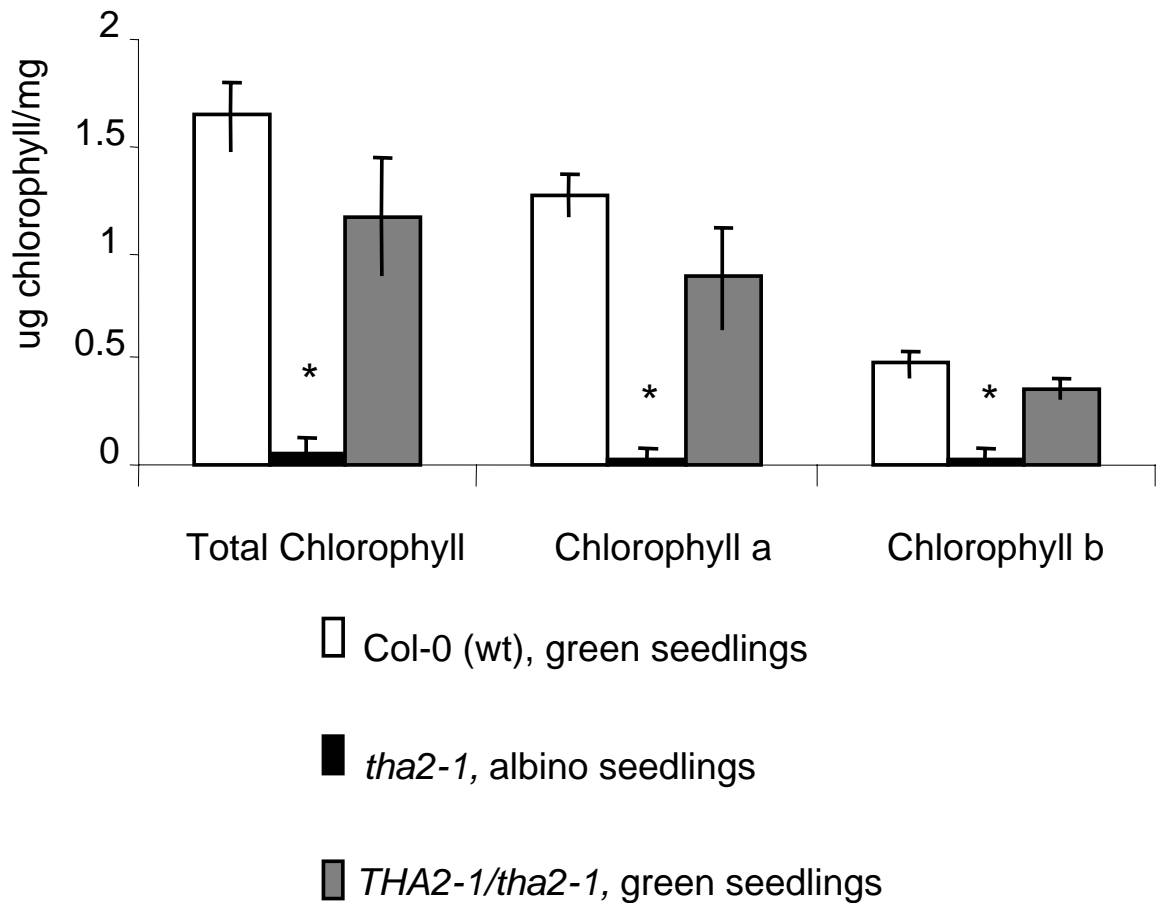

**Supplemental Figure 7.** Chlorophyll content of *tha2* albino seedlings is significantly reduced compared to wild type and *THA2* heterozygous seedlings. Mean +/- st. dev. of 3 samples. \*P < 0.01, Student's t-test compared to Col-0 (wt).
