# Supplementary material
Source: PubMed Central journal article supplement (PMC1785404)
Supplement: plntcell_tpc.106.044958_8.pdf [file plntcell_tpc.106.044958_8.pdf]

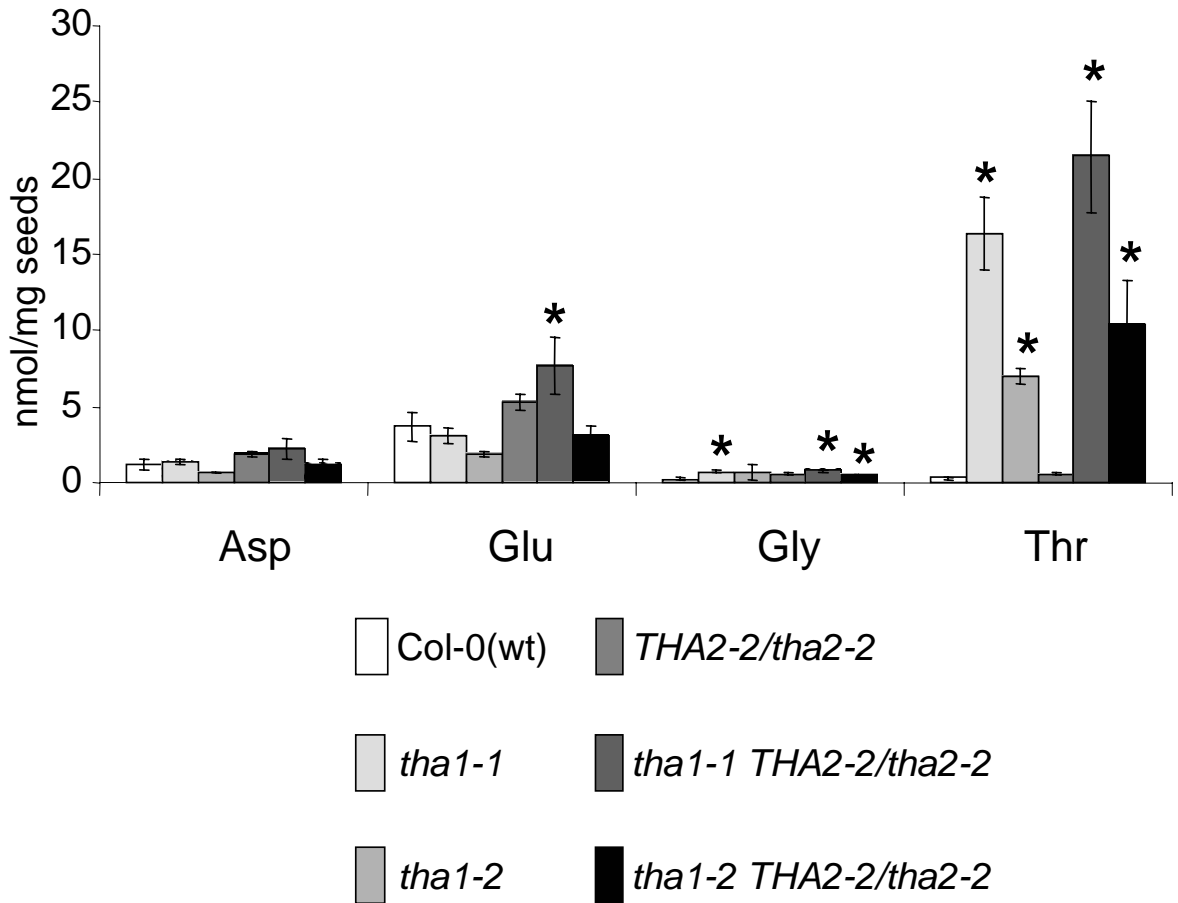

**Supplemental Figure 8.** Double mutants (homozygous *tha1* and heterozygous *THA2/tha2*) also accumulate higher amounts of free seed threonine relative to Col-0 seeds. Mean +/- st. dev. of 5 samples. \*P < 0.01, relative to Col-0 w.t., Student's t-test.
