# Supplementary material
Source: PubMed Central journal article supplement (PMC1785404)
Supplement: plntcell_tpc.106.044958_9.pdf [file plntcell_tpc.106.044958_9.pdf]

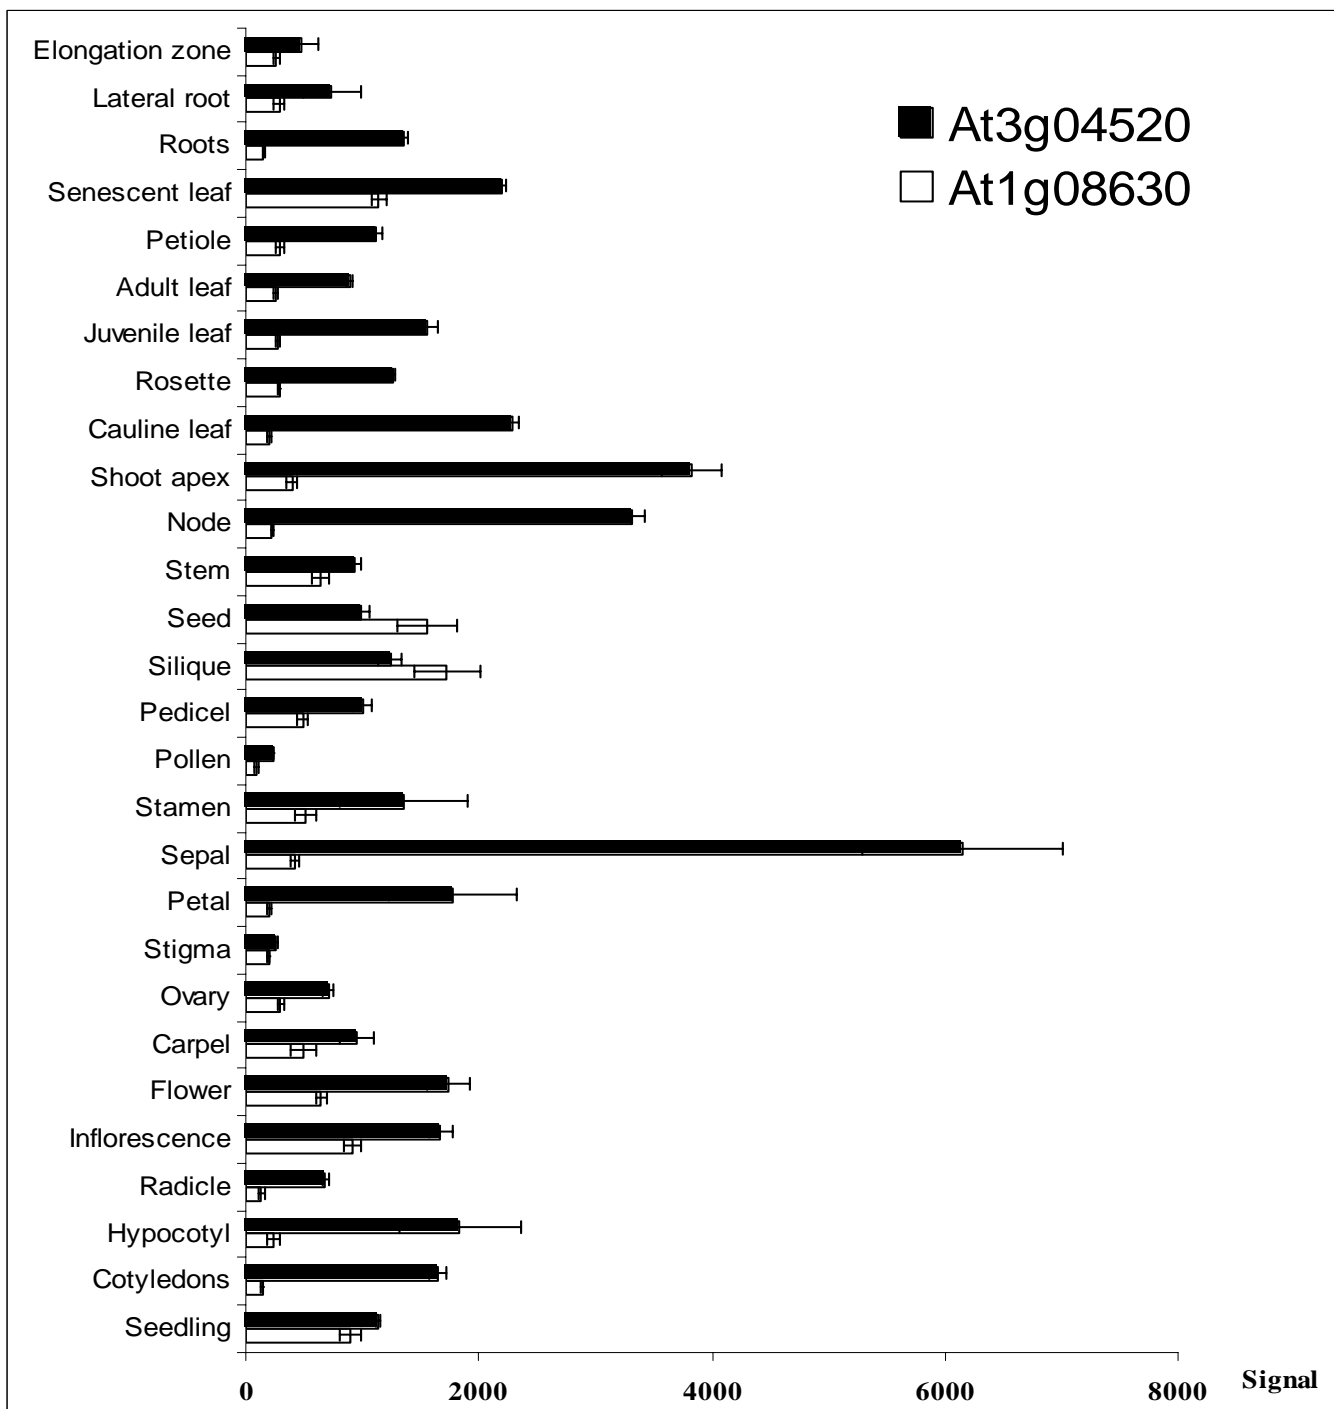

**Supplemental Figure 9.** Digital northern analysis of Arabidopsis *THA1* (At1g08630) and *THA2* (At3g04520) Thr aldolase expression. X-axis represents expression levels of the two genes based upon the signal intensities in various organs. Data for the analysis were obtained from the Genevestigator microarray data set ([www.genevestigator.ethz.ch](http://www.genevestigator.ethz.ch); Zimmermann et al., 2004).
