# Supplementary material
Source: PubMed Central journal article supplement (PMC1785404)
Supplement: plntcell_tpc.106.044958_10.pdf [file plntcell_tpc.106.044958_10.pdf]

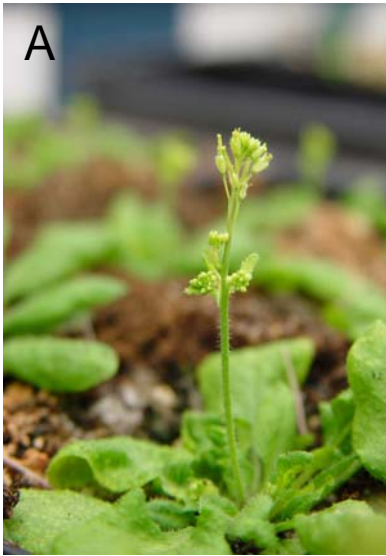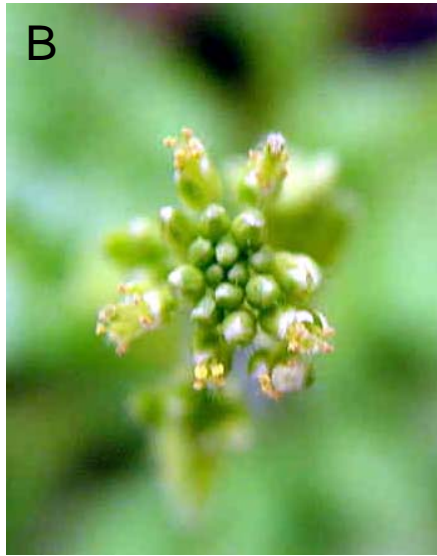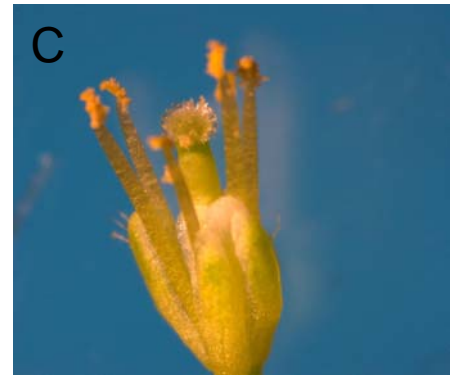

**Supplemental Figure 10.** *tha2-1/tha2-1 p35S-omr1-1* plants show chlorosis, leaf curling (A), and misshapen flowers (B, C).
