# Supplementary material
Source: PubMed Central journal article supplement (PMC1785404)
Supplement: plntcell_tpc.106.044958_13.pdf [file plntcell_tpc.106.044958_13.pdf]

**Supplemental Table 1:** Locations of the T-DNA insertions in the *THA1* and *THA2* genes confirmed after sequencing using gene specific and T-DNA specific primers. Letters in upper case represents Arabidopsis genomic DNA, whereas letters in lower case are T-DNA sequences.

***tha1-1*: Missense mutation**

GTGCATCCTAAGACAGTCAAGAATGAAGAAGAC<sup>(A)</sup>GGGACCATGGACTTGGAGGCC  
ATTGAAGCAGCTATTAGAGATCC

***tha1-2* : GABI-KAT insertion**

TGTTTCGTGCCATCCGGGACAATGGGGAATCTttacatggatcagcaatgagatgatgggtcaatat

***tha2-1*: SAIL5\_CO1 insertion**

TGTTTACACCACAATATACAAACTTgtttgaactcatttcttcaaccagaaat

***tha2-2*: SALK insertion (CS6934)**

TGACTCATCATCAAACTGTGGTCTAATTAATaaciaaattgacgcttagacaacttaataac

***tha2-3*: SALK insertion (CS6935)**

AATTTGTTTACACCACAATATATCCTGTActtgtcatacccaagctacattcag
