# Supplementary material
Source: PubMed Central journal article supplement (PMC1785404)
Supplement: plntcell_tpc.106.044958_14.pdf [file plntcell_tpc.106.044958_14.pdf]

**Supplemental Table 2.** PCR Primers used in this study

*CDTHA2F* 5' - AGCTGGATCCATGGTGACGCCAACTACAATTAG - 3'  
*CDTHA2R* 5' - ACTGCTGCAGTCACGAGTGAAATATTTTCTCAAAG - 3'

*gTHA1f* 5' - AGTCGGATCCGATAGAGAGAGAACAGAGACGCCAAT - 3'  
*gTHA1r* 5' - AGTCGAATTCCCATTAGTTTTGGTTACTAGTCAGGCT - 3'

*promTHA1F* 5' - GGGGACAAGTTTGTACAAAAAAGCAGGCTTCataaagggtcaggtcaggtggcta - 3'\*  
*promTHA1R* 5' - GGGGACCACTTTGTACAAGAAAGCTGGGTcctttacacctaatttacctataagatattg - 3'\*

*promTHA2F* 5' - GGGGACAAGTTTGTACAAAAAAGCAGGCTTCcgagaacaaaaactaagcaagca - 3'\*  
*promTHA2R* 5' - GGGGACCACTTTGTACAAGAAAGCTGGGTccttgattggctcactgcgtt - 3'\*

\*Uppercase letters are the *attB1* (for forward) and *attB2* (for reverse) primers (Gateway Technology, Invitrogen Life Technologies), whereas the lower case letters are specific to promoter regions of *Arabidopsis threonine aldolases*.

*tha1-2\_P1* 5' - CTTTAAGGTTCTTCCGTCAAAGT - 3'  
*tha1-2\_P2* 5' - CCCATTTGGACGTGAATGTAGACAC - 3'

*tha2-1\_P1* 5' - TTGTGGAGGTAGATGCCTTCCTA - 3'  
*tha2-1\_P2* 5' - CCGTTCAATCCGGTTCAGTTC - 3'

*tha2-2\_P1* 5' - CCACAGAAGCGTTGAAAATCC - 3'  
*tha2-2\_P2* 5' - ATCTCCATCATCCGGTACTAA - 3'

*tha2-3\_P1* 5' - TCAATGAATGAATAAAGCGTAGCAA - 3'  
*tha2-3\_P2* 5' - GGTTCCGGTAATCGTGGGAAGC - 3'

LBa1 5' - TGGTTCACGTAGTGGGCCATCG - 3'  
LBb1 5' - GCGTGGACCGCTTGCTGCAACT - 3'  
LB3 5' - TAGCATCTGAATTTTATAACCAATCTCGATACAC - 3'  
GAB-SEQ 5' - ATATTGACCATCATACTCATTGC - 3'

RTHA1F 5' - TATCGACTATCGGGGGAGTG - 3'  
RTHA1R 5' - AGCTTCACGCCATGT CTCTT - 3'

RTHA2F 5' - TCCCGTGAAGAGGATTGTTT - 3'  
RTHA2R 5' - CCCTGGCTTTCTTATGGTCA - 3'

UBQ1 5' - GATCTTTGCCGAAAACAATTGGAGGATGGT - 3'  
UBQ2 5' - CGACTTGTATTAGAAAAGAAAGAGATAACAGG - 3'

TA5F 5' - GTAAAACGACGGCCAGTGTGGGAGGTTTTCTTGGAGTG - 3'  
TA5R 5' - GGAAACAGCTATGACCATGGAATGAAGAAGACGGGACCA - 3'

TA6F 5' - GTAAAACGACGGCCAGTGCCTGAAACCAGAGTGTGTGTG - 3'  
TA6R 5' - GGAAACAGCTATGACCATGCGTCTTGAAGAGGAGATGGC - 3'

RNA<sub>t2-1\_P1</sub> 5' -GAAAGAGGTGGCTGAGATCG – 3'  
RNA<sub>t2-1\_P2</sub> 5' - CCCTGGCTTTCTTATGGTCA – 3'

At-tub-f 5' - CGTGGATCACAGCAATACAGAGCC – 3'  
At-tub-r 5' -CCTCCTGCACTTCCACTTCGTCTT – 3'

TA8F 5' - GTAAAACGACGGCCAGTGTGGATAAAAACGTGCTTCCTT – 3'  
TA8R 5' - GGAAACAGCTATGACCATGTCGTGATATTCTCCTCATTCCA
