# Supplementary material
Source: PubMed Central journal article supplement (PMC1785404)
Supplement: plntcell_tpc.106.044958_15.pdf [file plntcell_tpc.106.044958_15.pdf]

## Supplemental Table 3

### A. Metabolite profiles of flowers

|                    | <u>Col-0 wild type</u> | <u>tha1-1/tha1-1</u>      | <u>tha1-2/tha1-2</u>      | <u>THA2-1/tha2-1</u>      | <u>THA2-2/tha2-2</u>      |
|--------------------|------------------------|---------------------------|---------------------------|---------------------------|---------------------------|
| glutamine          | 1.00 ± 0.16            | 1.42 ± 0.08               | 1.07 ± 0.04               | 2.04 ± 0.16               | 1.36 ± 0.07               |
| asparagine         | 1.00 ± 0.18            | 0.88 ± 0.18               | 0.90 ± 0.08               | 1.24 ± 0.12               | 1.13 ± 0.07               |
| aspartic           | 1.00 ± 0.04            | 0.92 ± 0.04               | 0.99 ± 0.03               | 1.01 ± 0.02               | 0.96 ± 0.03               |
| threonine          | 1.00 ± 0.06            | 1.08 ± 0.03               | 0.99 ± 0.03               | 0.95 ± 0.08               | 0.84 ± 0.07               |
| serine             | 1.00 ± 0.06            | <b>0.68</b> ± <b>0.03</b> | 0.83 ± 0.03               | 0.93 ± 0.06               | 0.78 ± 0.08               |
| glycine            | 1.00 ± 0.05            | <b>0.65</b> ± <b>0.04</b> | 1.14 ± 0.02               | <b>0.71</b> ± <b>0.06</b> | <b>0.66</b> ± <b>0.09</b> |
| isoleucine         | 1.00 ± 0.05            | 0.83 ± 0.08               | 0.73 ± 0.10               | <b>2.55</b> ± <b>0.10</b> | <b>3.11</b> ± <b>0.05</b> |
| valine             | 1.00 ± 0.09            | 0.90 ± 0.04               | 0.92 ± 0.06               | <b>1.67</b> ± <b>0.03</b> | <b>1.73</b> ± <b>0.06</b> |
| maltose            | 1.00 ± 0.02            | <b>0.87</b> ± <b>0.02</b> | 0.88 ± 0.03               | <b>0.84</b> ± <b>0.02</b> | <b>0.77</b> ± <b>0.04</b> |
| trehalose          | 1.00 ± 0.04            | <b>0.70</b> ± <b>0.07</b> | 1.18 ± 0.05               | <b>0.52</b> ± <b>0.07</b> | <b>0.53</b> ± <b>0.03</b> |
| sucrose            | 1.00 ± 0.06            | <b>0.62</b> ± <b>0.03</b> | <b>0.65</b> ± <b>0.05</b> | <b>0.48</b> ± <b>0.01</b> | <b>0.53</b> ± <b>0.04</b> |
| glucose            | 1.00 ± 0.04            | 1.25 ± 0.05               | 0.92 ± 0.11               | 1.03 ± 0.02               | 0.98 ± 0.06               |
| galactose          | 1.00 ± 0.04            | <b>0.83</b> ± <b>0.02</b> | 1.00 ± 0.07               | <b>0.79</b> ± <b>0.03</b> | <b>0.71</b> ± <b>0.02</b> |
| mannose            | 1.00 ± 0.04            | <b>0.67</b> ± <b>0.02</b> | 1.05 ± 0.04               | <b>0.50</b> ± <b>0.04</b> | <b>0.39</b> ± <b>0.04</b> |
| fructose           | 1.00 ± 0.02            | <b>0.73</b> ± <b>0.03</b> | 0.97 ± 0.01               | <b>0.56</b> ± <b>0.01</b> | <b>0.50</b> ± <b>0.03</b> |
| arabinose          | 1.00 ± 0.02            | <b>0.72</b> ± <b>0.03</b> | 0.98 ± 0.04               | <b>0.82</b> ± <b>0.04</b> | 0.93 ± 0.05               |
| xylose             | 1.00 ± 0.02            | <b>0.78</b> ± <b>0.04</b> | 1.03 ± 0.03               | <b>0.18</b> ± <b>0.03</b> | <b>0.17</b> ± <b>0.03</b> |
| glucose-6-P        | 1.00 ± 0.07            | 0.85 ± 0.05               | 1.09 ± 0.06               | 0.75 ± 0.09               | <b>0.53</b> ± <b>0.06</b> |
| fructose-6-P       | 1.00 ± 0.08            | 0.84 ± 0.04               | 1.01 ± 0.06               | 0.78 ± 0.09               | <b>0.58</b> ± <b>0.06</b> |
| isocitrate         | 1.00 ± 0.06            | <b>0.17</b> ± <b>0.14</b> | <b>0.18</b> ± <b>0.07</b> | <b>0.24</b> ± <b>0.16</b> | <b>0.16</b> ± <b>0.19</b> |
| citrate            | 1.00 ± 0.03            | <b>0.73</b> ± <b>0.04</b> | <b>0.84</b> ± <b>0.03</b> | <b>0.85</b> ± <b>0.03</b> | <b>0.83</b> ± <b>0.02</b> |
| shikimate          | 1.00 ± 0.03            | 0.97 ± 0.04               | <b>0.81</b> ± <b>0.04</b> | <b>0.37</b> ± <b>0.08</b> | <b>0.42</b> ± <b>0.03</b> |
| a-kt-glutaric acid | 1.00 ± 0.04            | 1.14 ± 0.04               | <b>1.38</b> ± <b>0.04</b> | <b>0.72</b> ± <b>0.02</b> | 0.86 ± 0.04               |
| glycerate          | 1.00 ± 0.05            | 0.79 ± 0.07               | 0.79 ± 0.05               | <b>0.42</b> ± <b>0.07</b> | <b>0.38</b> ± <b>0.02</b> |
| succinate          | 1.00 ± 0.03            | 0.89 ± 0.04               | 0.89 ± 0.02               | 0.85 ± 0.02               | 0.97 ± 0.02               |
| malate             | 1.00 ± 0.03            | 1.00 ± 0.03               | 0.89 ± 0.03               | <b>0.79</b> ± <b>0.01</b> | <b>0.75</b> ± <b>0.02</b> |
| phosphoric acid    | 1.00 ± 0.13            | <b>1.50</b> ± <b>0.02</b> | <b>1.45</b> ± <b>0.04</b> | <b>1.67</b> ± <b>0.06</b> | <b>1.54</b> ± <b>0.03</b> |

### B. Metabolite profiles of leaves

|                  | <u>Col-0 wild type</u> | <u>tha1-1/tha1-1</u>      | <u>tha1-2/tha1-2</u>      | <u>THA2-1/tha2-1</u>      | <u>THA2-2/tha2-2</u>      |
|------------------|------------------------|---------------------------|---------------------------|---------------------------|---------------------------|
| threonine        | 1.00 ± 0.20            | 0.71 ± 0.22               | 0.98 ± 0.13               | 0.67 ± 0.13               | 0.99 ± 0.07               |
| serine           | 1.00 ± 0.08            | <b>0.46</b> ± <b>0.10</b> | 0.92 ± 0.07               | 0.69 ± 0.05               | 0.88 ± 0.10               |
| glycine          | 1.00 ± 0.31            | <b>0.41</b> ± <b>0.12</b> | 0.83 ± 0.23               | <b>0.42</b> ± <b>0.09</b> | <b>0.42</b> ± <b>0.11</b> |
| isoleucine       | 1.00 ± 0.08            | 0.78 ± 0.09               | 0.88 ± 0.02               | 1.15 ± 0.13               | <b>1.43</b> ± <b>0.05</b> |
| leucine          | 1.00 ± 0.08            | 1.32 ± 0.08               | <b>1.90</b> ± <b>0.09</b> | <b>1.80</b> ± <b>0.17</b> | <b>2.09</b> ± <b>0.13</b> |
| valine           | 1.00 ± 0.04            | 0.93 ± 0.06               | 0.95 ± 0.07               | 1.21 ± 0.11               | <b>1.98</b> ± <b>0.04</b> |
| isomaltose       | 1.00 ± 0.11            | 1.07 ± 0.17               | 1.27 ± 0.09               | 1.67 ± 0.26               | 2.25 ± 0.23               |
| sucrose          | 1.00 ± 0.24            | 0.55 ± 0.10               | 1.06 ± 0.07               | <b>0.64</b> ± <b>0.04</b> | 0.82 ± 0.00               |
| glucose          | 1.00 ± 0.33            | 2.38 ± 0.19               | <b>6.19</b> ± <b>0.15</b> | 0.58 ± 0.18               | 0.53 ± 0.16               |
| galactose        | 1.00 ± 0.24            | 0.99 ± 0.15               | <b>3.33</b> ± <b>0.14</b> | 0.93 ± 0.19               | 1.34 ± 0.24               |
| mannose          | 1.00 ± 0.19            | 1.24 ± 0.09               | <b>3.27</b> ± <b>0.15</b> | 0.67 ± 0.20               | 0.95 ± 0.24               |
| fructose         | 1.00 ± 0.16            | 1.31 ± 0.12               | <b>3.16</b> ± <b>0.13</b> | 0.90 ± 0.19               | 0.83 ± 0.22               |
| 18:0 fatty acid  | 1.00 ± 0.09            | 0.71 ± 0.12               | <b>0.46</b> ± <b>0.05</b> | <b>0.42</b> ± <b>0.12</b> | <b>0.50</b> ± <b>0.12</b> |
| 16:0 fatty acid  | 1.00 ± 0.08            | 0.72 ± 0.06               | 0.70 ± 0.11               | <b>0.59</b> ± <b>0.10</b> | 0.73 ± 0.08               |
| dehydroascorbate | 1.00 ± 0.08            | 0.93 ± 0.09               | 1.54 ± 0.08               | 1.08 ± 0.15               | 1.55 ± 0.09               |
| citrate          | 1.00 ± 0.29            | 0.47 ± 0.17               | 1.17 ± 0.14               | 2.20 ± 0.28               | 0.82 ± 0.18               |
| malate           | 1.00 ± 0.06            | 0.98 ± 0.08               | 1.27 ± 0.03               | 0.80 ± 0.09               | 1.11 ± 0.07               |

### C. Metabolite profiles of stems

|                 | <u>Col-0 wild type</u> | <u>tha1-1/tha1-1</u> | <u>tha1-2/tha1-2</u> | <u>THA2-1/tha2-1</u> | <u>THA2-2/tha2-2</u> |
|-----------------|------------------------|----------------------|----------------------|----------------------|----------------------|
| glutamate       | 1.00 ± 0.31            | 1.33 ± 0.44          | 1.98 ± 0.29          | 1.07 ± 0.43          | 0.83 ± 0.41          |
| aspartate       | 1.00 ± 0.08            | <b>0.55 ± 0.08</b>   | <b>0.73 ± 0.08</b>   | <b>0.54 ± 0.11</b>   | <b>0.47 ± 0.13</b>   |
| threonine       | 1.00 ± 0.11            | 1.01 ± 0.14          | 0.76 ± 0.24          | 1.31 ± 0.22          | 1.26 ± 0.21          |
| serine          | 1.00 ± 0.21            | 0.85 ± 0.09          | 0.61 ± 0.05          | 1.95 ± 0.27          | 1.39 ± 0.17          |
| glycine         | 1.00 ± 0.12            | 0.62 ± 0.10          | 0.78 ± 0.08          | 0.69 ± 0.10          | 0.67 ± 0.07          |
| isoleucine      | 1.00 ± 0.11            | 0.89 ± 0.07          | 0.89 ± 0.05          | <b>1.65 ± 0.11</b>   | 1.09 ± 0.03          |
| valine          | 1.00 ± 0.05            | <b>0.42 ± 0.13</b>   | <b>0.39 ± 0.05</b>   | <b>0.47 ± 0.11</b>   | <b>0.42 ± 0.07</b>   |
| raffinose       | 1.00 ± 0.16            | 1.34 ± 0.41          | 1.56 ± 0.27          | 2.93 ± 0.36          | 1.13 ± 0.35          |
| isomaltose      | 1.00 ± 0.13            | 1.46 ± 0.19          | 2.53 ± 0.20          | 1.63 ± 0.20          | 1.21 ± 0.15          |
| trehalose       | 1.00 ± 0.25            | 0.86 ± 0.21          | 2.77 ± 0.04          | 1.51 ± 0.06          | 1.93 ± 0.09          |
| sucrose         | 1.00 ± 0.09            | <b>0.50 ± 0.12</b>   | <b>0.65 ± 0.06</b>   | 0.73 ± 0.15          | 0.91 ± 0.10          |
| glucose         | 1.00 ± 0.05            | <b>0.63 ± 0.04</b>   | 0.87 ± 0.10          | <b>0.67 ± 0.08</b>   | <b>0.58 ± 0.05</b>   |
| galactose       | 1.00 ± 0.07            | 1.04 ± 0.04          | <b>1.58 ± 0.04</b>   | 1.05 ± 0.15          | 1.07 ± 0.07          |
| mannose         | 1.00 ± 0.19            | 0.35 ± 0.11          | 0.69 ± 0.05          | 0.68 ± 0.14          | 0.47 ± 0.09          |
| fructose        | 1.00 ± 0.15            | <b>0.39 ± 0.22</b>   | <b>0.34 ± 0.05</b>   | 0.34 ± 0.09          | 0.56 ± 0.16          |
| 18:0 fatty acid | 1.00 ± 0.07            | <b>1.89 ± 0.06</b>   | <b>2.09 ± 0.06</b>   | <b>2.01 ± 0.04</b>   | 1.15 ± 0.06          |
| 16:0 fatty acid | 1.00 ± 0.06            | <b>1.63 ± 0.05</b>   | <b>1.81 ± 0.06</b>   | <b>1.77 ± 0.02</b>   | <b>0.73 ± 0.13</b>   |
| myo-inositol    | 1.00 ± 0.08            | 1.09 ± 0.16          | 1.39 ± 0.06          | 0.70 ± 0.13          | 0.75 ± 0.15          |
| gluconic acid   | 1.00 ± 0.24            | 0.67 ± 0.06          | 0.93 ± 0.11          | 0.55 ± 0.08          | 0.66 ± 0.08          |
| isocitrate      | 1.00 ± 0.27            | 0.62 ± 0.27          | 0.81 ± 0.32          | 0.76 ± 0.22          | 1.22 ± 0.32          |
| citrate         | 1.00 ± 0.08            | <b>0.50 ± 0.16</b>   | 0.90 ± 0.09          | 0.86 ± 0.20          | 1.21 ± 0.14          |
| phosphoric acid | 1.00 ± 0.05            | 1.21 ± 0.09          | <b>1.78 ± 0.08</b>   | <b>1.38 ± 0.05</b>   | <b>1.62 ± 0.11</b>   |

### D Metabolite profiles of siliques

|                 | <u>Col-0 wild type</u> | <u>tha1-1/tha1-1</u> | <u>tha1-2/tha1-2</u> | <u>THA2-1/tha2-1</u> | <u>THA2-2/tha2-2</u> |
|-----------------|------------------------|----------------------|----------------------|----------------------|----------------------|
| glutamate       | 1.00 ± 0.19            | 0.61 ± 0.30          | 1.18 ± 0.15          | 0.88 ± 0.19          | 1.14 ± 0.13          |
| tyrosine        | 1.00 ± 0.04            | 0.95 ± 0.12          | 1.13 ± 0.02          | <b>4.79 ± 0.03</b>   | <b>5.47 ± 0.04</b>   |
| asparagine      | 1.00 ± 0.26            | 1.29 ± 0.57          | 1.32 ± 0.28          | 0.92 ± 0.29          | 1.15 ± 0.26          |
| aspartic        | 1.00 ± 0.05            | 1.07 ± 0.05          | <b>1.28 ± 0.02</b>   | 1.01 ± 0.07          | <b>1.28 ± 0.02</b>   |
| threonine       | 1.00 ± 0.09            | 1.13 ± 0.13          | 1.42 ± 0.07          | 0.91 ± 0.10          | 0.88 ± 0.06          |
| serine          | 1.00 ± 0.09            | 0.68 ± 0.07          | 1.31 ± 0.04          | 0.87 ± 0.11          | 0.82 ± 0.05          |
| glycine         | 1.00 ± 0.07            | 1.28 ± 0.06          | 1.10 ± 0.04          | <b>0.58 ± 0.05</b>   | <b>0.69 ± 0.02</b>   |
| isoleucine      | 1.00 ± 0.04            | 1.05 ± 0.32          | 0.91 ± 0.08          | <b>5.07 ± 0.06</b>   | <b>5.39 ± 0.02</b>   |
| leucine         | 1.00 ± 0.02            | 0.92 ± 0.11          | 1.05 ± 0.04          | <b>7.15 ± 0.07</b>   | <b>7.89 ± 0.04</b>   |
| valine          | 1.00 ± 0.03            | 0.92 ± 0.16          | 0.89 ± 0.03          | <b>3.02 ± 0.04</b>   | <b>3.40 ± 0.03</b>   |
| isomaltose      | 1.00 ± 0.04            | <b>0.67 ± 0.03</b>   | <b>3.33 ± 0.10</b>   | <b>0.57 ± 0.10</b>   | <b>0.52 ± 0.07</b>   |
| maltose         | 1.00 ± 0.04            | 0.85 ± 0.02          | 1.14 ± 0.03          | <b>0.82 ± 0.04</b>   | <b>0.81 ± 0.02</b>   |
| trehalose       | 1.00 ± 0.04            | <b>0.71 ± 0.03</b>   | <b>1.46 ± 0.08</b>   | <b>0.62 ± 0.02</b>   | 0.93 ± 0.05          |
| sucrose         | 1.00 ± 0.06            | <b>0.73 ± 0.03</b>   | <b>0.63 ± 0.03</b>   | <b>0.20 ± 0.07</b>   | <b>0.40 ± 0.09</b>   |
| glucose         | 1.00 ± 0.04            | 0.90 ± 0.03          | <b>1.23 ± 0.02</b>   | <b>0.46 ± 0.07</b>   | <b>0.48 ± 0.08</b>   |
| galactose       | 1.00 ± 0.04            | 1.01 ± 0.11          | 1.17 ± 0.03          | <b>0.54 ± 0.07</b>   | <b>0.51 ± 0.06</b>   |
| mannose         | 1.00 ± 0.11            | 1.02 ± 0.10          | 1.21 ± 0.13          | 0.59 ± 0.11          | 0.58 ± 0.10          |
| fructose        | 1.00 ± 0.03            | 0.92 ± 0.02          | <b>1.18 ± 0.02</b>   | <b>0.56 ± 0.03</b>   | <b>0.65 ± 0.02</b>   |
| rhamnose        | 1.00 ± 0.14            | 0.57 ± 0.08          | 1.42 ± 0.08          | <b>2.28 ± 0.12</b>   | <b>2.26 ± 0.13</b>   |
| xylose          | 1.00 ± 0.07            | 0.92 ± 0.07          | <b>1.39 ± 0.03</b>   | 0.82 ± 0.07          | <b>0.71 ± 0.05</b>   |
| 18:0 fatty acid | 1.00 ± 0.12            | 1.03 ± 0.15          | 1.18 ± 0.03          | 0.90 ± 0.06          | 0.74 ± 0.03          |
| 16:0 fatty acid | 1.00 ± 0.10            | 1.11 ± 0.15          | <b>1.39 ± 0.02</b>   | 0.94 ± 0.05          | 0.87 ± 0.02          |

|                 |             |                           |                           |                           |                           |
|-----------------|-------------|---------------------------|---------------------------|---------------------------|---------------------------|
| myo-inositol    | 1.00 ± 0.07 | <b>1.58</b> ± <b>0.06</b> | <b>1.52</b> ± <b>0.01</b> | <b>0.47</b> ± <b>0.06</b> | <b>0.46</b> ± <b>0.05</b> |
| isocitrate      | 1.00 ± 0.34 | 0.54 ± 0.09               | 1.03 ± 0.08               | 1.12 ± 0.11               | 1.27 ± 0.00               |
| citrate         | 1.00 ± 0.06 | 0.81 ± 0.05               | <b>0.60</b> ± <b>0.06</b> | 1.37 ± 0.10               | <b>1.76</b> ± <b>0.08</b> |
| malate          | 1.00 ± 0.03 | 0.99 ± 0.02               | 1.00 ± 0.02               | 0.77 ± 0.07               | 0.90 ± 0.02               |
| citramalate     | 1.00 ± 0.05 | <b>0.70</b> ± <b>0.03</b> | <b>0.67</b> ± <b>0.04</b> | 0.77 ± 0.11               | 0.94 ± 0.11               |
| fumarate        | 1.00 ± 0.14 | 1.23 ± 0.02               | 1.15 ± 0.02               | 0.84 ± 0.04               | 0.88 ± 0.03               |
| succinate       | 1.00 ± 0.02 | 0.97 ± 0.03               | 1.08 ± 0.02               | <b>0.80</b> ± <b>0.02</b> | <b>0.80</b> ± <b>0.02</b> |
| phosphoric acid | 1.00 ± 0.16 | 0.91 ± 0.08               | <b>2.08</b> ± <b>0.14</b> | 1.52 ± 0.24               | <b>2.59</b> ± <b>0.05</b> |

#### E. Metabolite profiles of seeds

|                 | <u>Col-0 wild type</u> | <u><i>tha1-1/tha1-1</i></u> | <u><i>tha1-2/tha1-2</i></u> | <u><i>THA2-1/tha2-1</i></u> | <u><i>THA2-2/tha2-2</i></u> |
|-----------------|------------------------|-----------------------------|-----------------------------|-----------------------------|-----------------------------|
| threonine       | 1.00 ± 0.12            | <b>117.0</b> ± <b>0.21</b>  | <b>51.87</b> ± <b>0.13</b>  | 0.92 ± 0.10                 | 0.68 ± 0.15                 |
| glycine         | 1.00 ± 0.08            | <b>2.56</b> ± <b>0.13</b>   | 1.22 ± 0.16                 | 0.86 ± 0.10                 | 0.65 ± 0.14                 |
| isoleucine      | 1.00 ± 0.15            | 1.18 ± 0.06                 | 0.64 ± 0.19                 | 0.60 ± 0.24                 | 0.43 ± 0.22                 |
| valine          | 1.00 ± 0.05            | <b>1.20</b> ± <b>0.03</b>   | <b>0.43</b> ± <b>0.04</b>   | 0.93 ± 0.10                 | <b>0.24</b> ± <b>0.21</b>   |
| alanine         | 1.00 ± 0.15            | 1.29 ± 0.13                 | 0.75 ± 0.09                 | <b>2.16</b> ± <b>0.07</b>   | <b>3.81</b> ± <b>0.13</b>   |
| melezitose      | 1.00 ± 0.02            | <b>1.44</b> ± <b>0.04</b>   | 1.02 ± 0.03                 | <b>1.77</b> ± <b>0.07</b>   | <b>1.57</b> ± <b>0.08</b>   |
| raffinose       | 1.00 ± 0.06            | 1.11 ± 0.03                 | 1.05 ± 0.03                 | <b>1.74</b> ± <b>0.05</b>   | <b>1.90</b> ± <b>0.04</b>   |
| isomaltose      | 1.00 ± 0.07            | 0.80 ± 0.04                 | 0.82 ± 0.07                 | 1.12 ± 0.07                 | 0.95 ± 0.06                 |
| maltose         | 1.00 ± 0.16            | 1.44 ± 0.15                 | 1.35 ± 0.11                 | 1.97 ± 0.16                 | 1.43 ± 0.15                 |
| sucrose         | 1.00 ± 0.06            | 1.01 ± 0.08                 | 0.99 ± 0.15                 | 1.02 ± 0.15                 | 1.00 ± 0.05                 |
| mannitol        | 1.00 ± 0.04            | <b>2.02</b> ± <b>0.04</b>   | <b>2.24</b> ± <b>0.02</b>   | 0.97 ± 0.04                 | <b>1.57</b> ± <b>0.05</b>   |
| glucose         | 1.00 ± 0.03            | 1.14 ± 0.05                 | <b>1.19</b> ± <b>0.03</b>   | 1.15 ± 0.04                 | <b>1.39</b> ± <b>0.04</b>   |
| mannose         | 1.00 ± 0.05            | <b>1.65</b> ± <b>0.09</b>   | 1.23 ± 0.11                 | 1.16 ± 0.07                 | <b>1.54</b> ± <b>0.07</b>   |
| fructose        | 1.00 ± 0.11            | <b>1.61</b> ± <b>0.04</b>   | 1.01 ± 0.08                 | <b>2.36</b> ± <b>0.09</b>   | <b>1.79</b> ± <b>0.07</b>   |
| rhamnose        | 1.00 ± 0.03            | <b>0.68</b> ± <b>0.03</b>   | <b>0.48</b> ± <b>0.02</b>   | <b>0.71</b> ± <b>0.03</b>   | 1.16 ± 0.04                 |
| arabinose       | 1.00 ± 0.05            | 0.97 ± 0.05                 | 1.13 ± 0.06                 | 1.16 ± 0.07                 | <b>1.72</b> ± <b>0.07</b>   |
| gentiobiose     | 1.00 ± 0.10            | 1.07 ± 0.05                 | 0.87 ± 0.03                 | <b>1.42</b> ± <b>0.06</b>   | <b>1.51</b> ± <b>0.11</b>   |
| 18:0 fatty acid | 1.00 ± 0.02            | 0.95 ± 0.02                 | 0.91 ± 0.03                 | <b>0.84</b> ± <b>0.03</b>   | <b>0.79</b> ± <b>0.04</b>   |
| 16:0 fatty acid | 1.00 ± 0.01            | 0.98 ± 0.03                 | 0.92 ± 0.04                 | <b>0.89</b> ± <b>0.07</b>   | <b>0.77</b> ± <b>0.09</b>   |
| gluconate       | 1.00 ± 0.06            | <b>2.06</b> ± <b>0.03</b>   | <b>1.41</b> ± <b>0.02</b>   | <b>2.06</b> ± <b>0.07</b>   | <b>1.48</b> ± <b>0.03</b>   |
| isocitrate      | 1.00 ± 0.06            | <b>0.52</b> ± <b>0.03</b>   | <b>0.62</b> ± <b>0.14</b>   | <b>0.67</b> ± <b>0.03</b>   | <b>0.33</b> ± <b>0.07</b>   |
| citrate         | 1.00 ± 0.04            | <b>0.56</b> ± <b>0.03</b>   | <b>0.54</b> ± <b>0.04</b>   | <b>0.79</b> ± <b>0.02</b>   | <b>0.28</b> ± <b>0.04</b>   |
| malate          | 1.00 ± 0.08            | 0.91 ± 0.03                 | 0.92 ± 0.13                 | 0.88 ± 0.06                 | <b>0.45</b> ± <b>0.06</b>   |
| fumarate        | 1.00 ± 0.20            | 0.88 ± 0.06                 | 0.82 ± 0.11                 | 1.14 ± 0.07                 | <b>3.28</b> ± <b>0.06</b>   |
| phosphoric acid | 1.00 ± 0.07            | <b>0.61</b> ± <b>0.05</b>   | <b>0.42</b> ± <b>0.16</b>   | <b>0.72</b> ± <b>0.05</b>   | <b>0.52</b> ± <b>0.18</b>   |

**Supplemental Table 3.** Metabolite profiles of flowers (A), leaves (B), stems (C), seeds (D) and siliques (E). The data were determined from samples of tissue harvested at the same developmental stage and have been normalized as described in the Materials and Methods. Values are presented as mean ± SE of measurements of six independent samples, with the metabolite content of wild-type Col-0 arbitrarily set to one. Data determined by Student's t-test to be significantly different from Col-0 wild type ( $P < 0.01$ ) are set in bold type.
